# Supplementary material
Source: PubMed Central journal article supplement (PMC6849939)
Supplement: baADV2019000476-suppl1.pdf [file baADV2019000476-suppl1.pdf]

**Supplementary Table 1. ICD-10 codes.**

| <b>Disease</b>                                                                                                     | <b>ICD-10 code</b>           |
|--------------------------------------------------------------------------------------------------------------------|------------------------------|
| CAD                                                                                                                | D59.1A                       |
| Any venous thrombotic events                                                                                       | I81, I801–I803, I26, K55.0   |
| Portal vein obstruction                                                                                            | I81                          |
| DVT                                                                                                                | I801–I803                    |
| PE                                                                                                                 | I26                          |
| Mesenteric                                                                                                         | K55.0                        |
| Any cerebral thrombotic events                                                                                     | I82, I63, I65, I66, G46, G45 |
| Cerebral infarction, occlusion and stenosis of cerebral and precerebral arteries                                   | I82, I63, I65, I66           |
| Vascular syndromes of brain in cerebrovascular diseases, transient cerebral ischemic attacks and related syndromes | G46, G45                     |
| Any arterial thrombotic events                                                                                     | I74, I21, I22                |
| Arterial embolism and thrombosis                                                                                   | I74                          |
| MI                                                                                                                 | I21, I22                     |

CAD, cold agglutinin disease; DVT, deep vein thrombosis; ICD-10, *International Statistical Classification of Diseases and Related Health Problems, Tenth Revision*; MI, myocardial infarction; PE, pulmonary embolism.

**Supplemental Table 2.** ICD codes excluded for sensitivity analysis of primary CAD.

| <b>Disease</b>                                               | <b>ICD-8</b>                  | <b>ICD-10</b>                                                    |
|--------------------------------------------------------------|-------------------------------|------------------------------------------------------------------|
| Mycoplasma                                                   | 041.8                         | A49.3                                                            |
| Lymphoma                                                     |                               |                                                                  |
| Follicular lymphoma                                          | 202.0                         | C82.X                                                            |
| Non-follicular lymphoma                                      | 200.0; 200.1;<br>200.2; 200.8 | C83.X                                                            |
| Mature T/NK-cell lymphoma                                    | 202.1; 202.2;                 | C84.X                                                            |
| Other and unspecified types of non-Hodgkin lymphoma          | 202.8                         | C85.X                                                            |
| Other types of T/NK-cell lymphoma                            | 202.8                         | C86.X                                                            |
| HIV disease resulting in Burkitt lymphoma                    | 200.2                         | C83.7x (Burkitt lymphoma) with a code for HIV (B20; Z21; B97.35) |
| HIV disease resulting in other types of non-Hodgkin lymphoma | 202.8                         | C85.8x with a code for HIV (B20; Z21; B97.35)                    |
| MALT lymphoma                                                | N/A                           | C88.4                                                            |
| Chronic lymphoid leukemia                                    | 204.1                         | C91.1                                                            |
| Waldenström macroglobulinemia                                | 273.3                         | C88.0                                                            |
| Myeloma (any type of myeloma)                                | 203.0                         | C90.X                                                            |
| Cytomegalovirus                                              |                               |                                                                  |
| Congenital CMV                                               | 771.1                         | P35.1                                                            |
| Cytomegaloviral mononucleosis                                | 078.5                         | B27.1x                                                           |
| Cytomegaloviral disease                                      | 078.5                         | B25.X                                                            |
| Epstein Barr                                                 |                               |                                                                  |
| Infectious mononucleosis, unspecified                        | 075                           | B27.9                                                            |

CAD, cold agglutinin disease; CMV, cytomegalovirus; HIV, human immunodeficiency virus; ICD, International Classification of Diseases; MALT, mucosa-associated lymphoid tissue; N/A, Not available; NK, natural killer.
